# Supplementary material for: L-type voltage-gated calcium channel agonists mitigate hearing loss and modify ribbon synapse morphology in the zebrafish model of Usher syndrome type 1
Source: Oxford University Press journal article supplement (doi:10.1242/dmm.043885), 2020-11-01
Supplement: dmm043885supp.pdf [file dmm043885supp.pdf]

| <b>Setting</b>          | <b>Value</b>            |
|-------------------------|-------------------------|
| Angle Weight            | 100                     |
| Max Jump Distance       | 80                      |
| Max Jump D to Split     | 80                      |
| Min Jump Distance       | 10000                   |
| Center Dampening        | 0                       |
| Angle Dampening         | 0.5                     |
| Max Area Delete         | 200                     |
| Min Area Ignore         | 20000                   |
| Max Penalty Merge       | 5000                    |
| Lower Thresh            | 1                       |
| Max Clusters Per Blob   | 1                       |
| Max Blobs to Detect     | 2                       |
| Max Sequence Length     | 120 or 180 (frame rate) |
| Max Penalty Merge       | 5000                    |
| Max Pred Error Increase | 5000                    |

**Table S1. Tracking settings for motion, observation, and hindsight in Ctrax: The Caltech Multiple Fly Tracker.**

| wildtype untreated |                                           | wildtype untreated |                                           |
|--------------------|-------------------------------------------|--------------------|-------------------------------------------|
| CTBP2<br>Puncta    | <i>myo7aa</i> <sup>-/-</sup><br>untreated | MAGUK<br>Puncta    | <i>myo7aa</i> <sup>-/-</sup><br>untreated |
| 1                  | 0.61                                      | 1                  | 0.32                                      |
| 2                  | <b>0.05</b>                               | 2                  | 0.85                                      |
| 3                  | <b>0.02</b>                               | 3                  | 0.16                                      |
| 4                  | 0.34                                      | 4                  | 0.15                                      |
| 5                  | 0.46                                      | 5                  | 0.93                                      |
| 6+                 | 0.07                                      | 6+                 | 0.16                                      |

**Table S2.** *myo7aa*<sup>-/-</sup> have a statistically different distribution of CTBP2 puncta in the ribbon containing cells, but a similar distribution of MAGUK puncta in the post-synaptic densities. A t-test was used to determine statistical significance between wildtype and the *myo7aa*<sup>-/-</sup> mutant distribution of CTBP2 and MAGUK puncta. P-values are represented in each cell.

| <b>A</b>     |                                            | <b>wildtype untreated</b>           |                                      |  |
|--------------|--------------------------------------------|-------------------------------------|--------------------------------------|--|
| CTBP2 Puncta | wildtype<br>5 $\mu$ M ( $\pm$ )-Bay K 8644 | wildtype<br>250 $\mu$ M Nefiracetam | wildtype<br>125 $\mu$ M (R)-Baclofen |  |
| 1            | <b>0.0003</b>                              | <b>0.64</b>                         | <b>0.61</b>                          |  |
| 2            | <b>&lt;0.0001</b>                          | 0.13                                | <b>0.01</b>                          |  |
| 3            | <b>0.04</b>                                | 0.30                                | 0.25                                 |  |
| 4            | <b>0.03</b>                                | 0.13                                | 0.56                                 |  |
| 5            | 0.07                                       | 0.87                                | 0.13                                 |  |
| 6+           | 0.18                                       | 0.38                                | 0.04                                 |  |

  

| <b>B</b>     |                                                                | <b><i>myo7aa</i><sup>-/-</sup> untreated</b>            |                                                          |  |
|--------------|----------------------------------------------------------------|---------------------------------------------------------|----------------------------------------------------------|--|
| CTBP2 Puncta | <i>myo7aa</i> <sup>-/-</sup><br>5 $\mu$ M ( $\pm$ )-Bay K 8644 | <i>myo7aa</i> <sup>-/-</sup><br>250 $\mu$ M Nefiracetam | <i>myo7aa</i> <sup>-/-</sup><br>125 $\mu$ M (R)-Baclofen |  |
| 1            | 0.06                                                           | 0.23                                                    | 0.28                                                     |  |
| 2            | 0.27                                                           | 0.34                                                    | 0.22                                                     |  |
| 3            | <b>0.036</b>                                                   | <b>0.048</b>                                            | <b>0.025</b>                                             |  |
| 4            | 0.27                                                           | 0.66                                                    | 0.22                                                     |  |
| 5            | 0.09                                                           | 0.17                                                    | 0.11                                                     |  |
| 6+           | 0.63                                                           | 0.57                                                    | 0.74                                                     |  |

**Table S3. L-type voltage-gated calcium channel agonists change the distribution of CTBP2 puncta in *myo7aa*<sup>-/-</sup> mutant ribbon containing cells.** Table A represents the statistical analysis for all wildtype treated animals compared to untreated wildtype animals for each number of puncta. ( $\pm$ )-Bay K 8644 had the largest effect on wildtype ribbon containing cells. Table B represents statistical analysis for all *myo7aa*<sup>-/-</sup> treated animals compared to untreated *myo7aa*<sup>-/-</sup> animals for each number of puncta. All three L-type voltage-gated calcium channel agonists had a statistical significance at 3 puncta. A t-test was used to determine statistical significance between treated and untreated groups. P-values are represented in each cell.

| <b>A</b>     |                                            | <b>wildtype untreated</b>           |                                      |  |
|--------------|--------------------------------------------|-------------------------------------|--------------------------------------|--|
| MAGUK Puncta | wildtype<br>5 $\mu$ M ( $\pm$ )-Bay K 8644 | wildtype<br>250 $\mu$ M Nefiracetam | wildtype<br>125 $\mu$ M (R)-Baclofen |  |
| 1            | 0.22                                       | 0.08                                | 0.79                                 |  |
| 2            | 0.10                                       | 0.10                                | 0.36                                 |  |
| 3            | 0.98                                       | 0.92                                | 0.37                                 |  |
| 4            | <b>0.03</b>                                | 0.64                                | 0.12                                 |  |
| 5            | 0.31                                       | 0.99                                | 0.44                                 |  |
| 6+           | 0.67                                       | 0.60                                | 0.08                                 |  |

  

| <b>B</b>     |                                                                | <b><i>myo7aa</i><sup>-/-</sup> untreated</b>            |                                                          |  |
|--------------|----------------------------------------------------------------|---------------------------------------------------------|----------------------------------------------------------|--|
| MAGUK Puncta | <i>myo7aa</i> <sup>-/-</sup><br>5 $\mu$ M ( $\pm$ )-Bay K 8644 | <i>myo7aa</i> <sup>-/-</sup><br>250 $\mu$ M Nefiracetam | <i>myo7aa</i> <sup>-/-</sup><br>125 $\mu$ M (R)-Baclofen |  |
| 1            | 0.83                                                           | 0.74                                                    | 0.45                                                     |  |
| 2            | 0.32                                                           | 0.68                                                    | 0.26                                                     |  |
| 3            | 0.46                                                           | 0.64                                                    | 0.40                                                     |  |
| 4            | 0.65                                                           | 0.66                                                    | 0.61                                                     |  |
| 5            | 0.98                                                           | 0.78                                                    | 0.33                                                     |  |
| 6+           | 0.61                                                           | 0.79                                                    | 0.29                                                     |  |

**Table S4. L-type voltage-gated calcium channel agonists do not change the distribution of MAGUK puncta in *myo7aa*<sup>-/-</sup> mutant post-synaptic densities.** Table A represents statistical analysis for all wildtype treated animals compared to untreated wildtype animals for each number of puncta. There was no change in the distribution of MAGUK puncta, except at 4 puncta upon incubation with 5  $\mu$ M ( $\pm$ )-Bay K 8644. Table B represents statistical analysis for all *myo7aa*<sup>-/-</sup> treated animals compared to untreated *myo7aa*<sup>-/-</sup> animals for each number of puncta. All three L-type voltage-gated calcium channel agonists had no effect on the number of MAGUK puncta in the post-synaptic densities. A t-test was used to determine statistical significance between treated and untreated groups. P-values are represented in each cell.

| <b>A</b>       |                                            | <b>wildtype untreated</b>           |                                      |  |
|----------------|--------------------------------------------|-------------------------------------|--------------------------------------|--|
| Frequency (Hz) | wildtype<br>5 $\mu$ M ( $\pm$ )-Bay K 8644 | wildtype<br>250 $\mu$ M Nefiracetam | wildtype<br>125 $\mu$ M (R)-Baclofen |  |
| 200            | 0.34                                       | <b>0.0001</b>                       | <b>&lt;0.0001</b>                    |  |
| 300            | <b>0.0009</b>                              | <b>0.003</b>                        | <b>&lt;0.0001</b>                    |  |
| 400            | <b>0.04</b>                                | <b>0.01</b>                         | <b>&lt;0.0001</b>                    |  |
| 500            | <b>&lt;0.0001</b>                          | <b>0.03</b>                         | <b>&lt;0.0001</b>                    |  |
| 600            | <b>0.002</b>                               | <b>0.006</b>                        | <b>0.0004</b>                        |  |

  

| <b>B</b>       |                                                                | <b><i>myo7aa</i><sup>-/-</sup> untreated</b>            |                                                          |  |
|----------------|----------------------------------------------------------------|---------------------------------------------------------|----------------------------------------------------------|--|
| Frequency (Hz) | <i>myo7aa</i> <sup>-/-</sup><br>5 $\mu$ M ( $\pm$ )-Bay K 8644 | <i>myo7aa</i> <sup>-/-</sup><br>250 $\mu$ M Nefiracetam | <i>myo7aa</i> <sup>-/-</sup><br>125 $\mu$ M (R)-Baclofen |  |
| 200            | <b>&lt;0.0001</b>                                              | <b>0.016</b>                                            | 1.0                                                      |  |
| 300            | <b>0.006</b>                                                   | 1.0                                                     | 1.0                                                      |  |
| 400            | <b>&lt;0.0001</b>                                              | <b>0.008</b>                                            | 1.0                                                      |  |
| 500            | <b>0.006</b>                                                   | 0.08                                                    | 1.0                                                      |  |
| 600            | <b>&lt;0.0001</b>                                              | 0.14                                                    | 0.51                                                     |  |

**Table S5. ( $\pm$ )-Bay K 8644 produces the most robust improvement in acoustic startle response in *myo7aa*<sup>-/-</sup> mutants.** Table A represents statistical analysis for all wildtype treated animals compared to untreated wildtype animals for each frequency. Table B represents statistical analysis for all *myo7aa*<sup>-/-</sup> mutants treated compared to untreated *myo7aa*<sup>-/-</sup> mutants for each frequency. A two-tailed Fisher's exact test was used to determine statistical significance between untreated and treated group. P-values are represented in each cell.

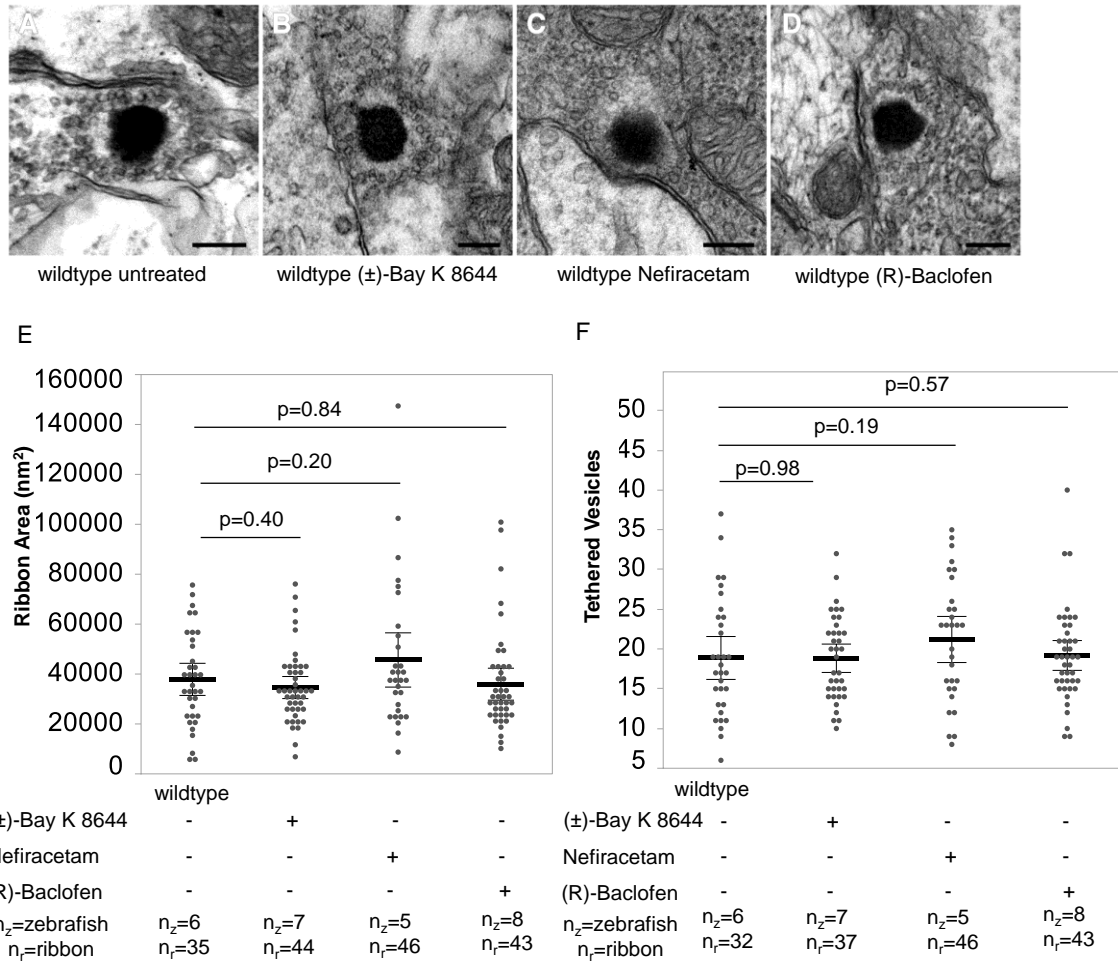

**Fig. S1. Wildtype ribbon synapses unaffected with exposure to L-type voltage-gated calcium channel agonists.** (A-D) Representative images of 5 dpf wildtype untreated and treated with 5  $\mu$ M ( $\pm$ )-Bay K 8644 (B), 250  $\mu$ M Nefiracetam (C) and 125  $\mu$ M (R)-Baclofen (D) ribbon synapse structure obtained with transmission electron microscopy. Scale bars: 200 nm. (E) Wildtype treated and untreated ribbon synapse areas are comparable. (F) Additionally, untreated and treated wildtype ribbons have a comparable number of tethered vesicles. Black bold line represents the mean of the data set and error bars are 95% confidence intervals. Experiments were replicated two times for wildtype animals incubated in 5  $\mu$ M ( $\pm$ )-Bay K 8644, four times for animals incubated in 250  $\mu$ M Nefiracetam and three times for animals incubated in 125  $\mu$ M (R)-Baclofen.

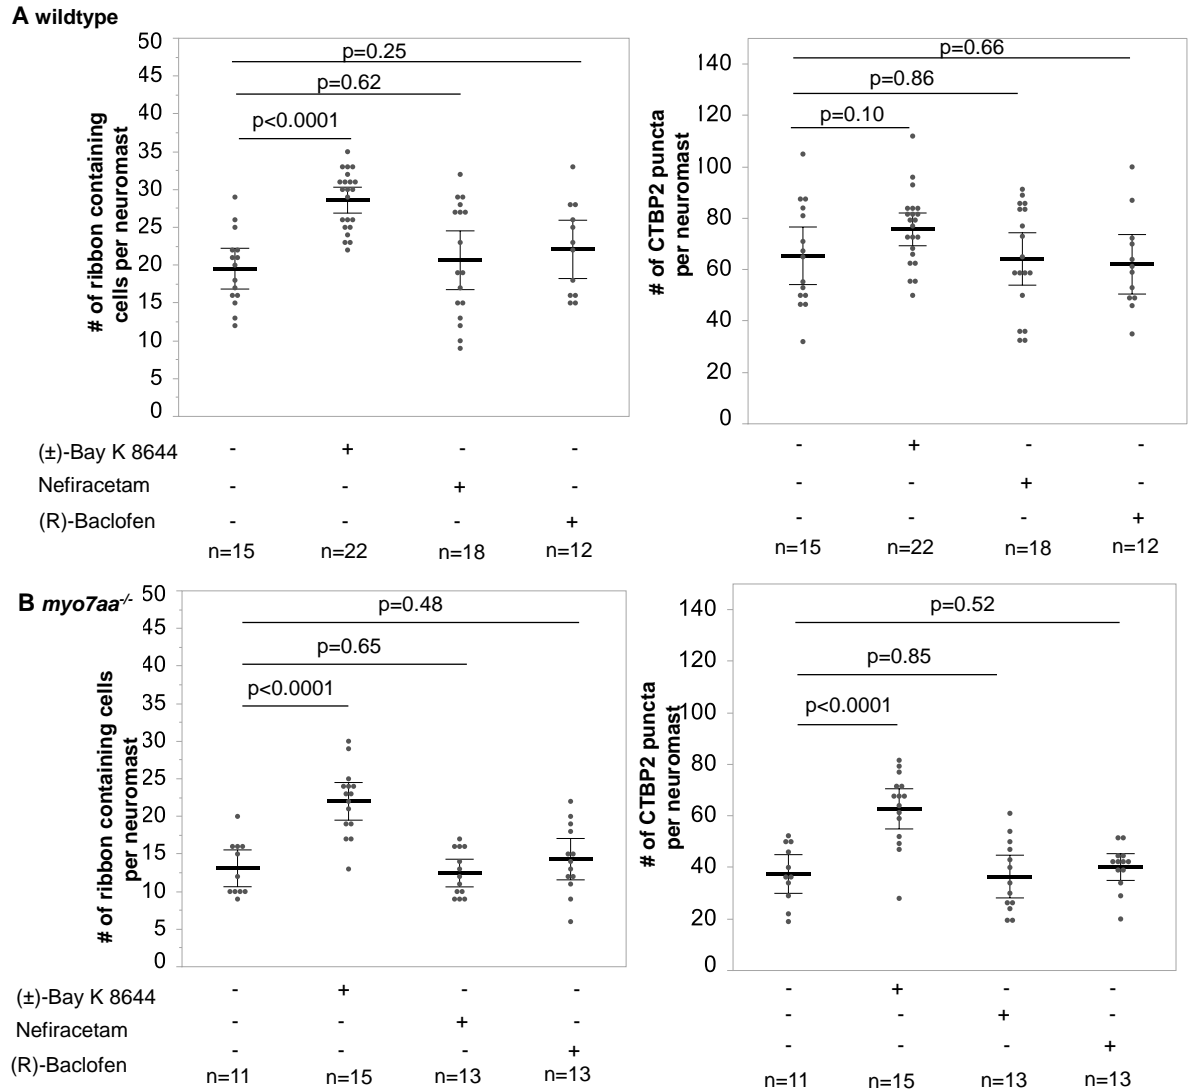

**Fig. S2 (±)-Bay K 8644 increases total number of ribbon containing cells per neuromast and total number of CTBP2 puncta per neuromast in both wildtype and *myo7aa*<sup>-/-</sup> mutants.** (A) 5 dpf wildtype neuromasts treated with (±)-Bay K 8644 have a greater number of ribbon containing cells and total number of CTBP2 puncta compared to untreated wildtype neuromasts (t-test). (B) 5 dpf *myo7aa*<sup>-/-</sup> neuromasts treated with (±)-Bay K 8644 have a greater number of ribbon containing cells per neuromast and total number of CTBP2 puncta compared to untreated *myo7aa*<sup>-/-</sup> neuromasts (t-test). Black bold line represents the mean of the data set and error bars are 95% confidence intervals.

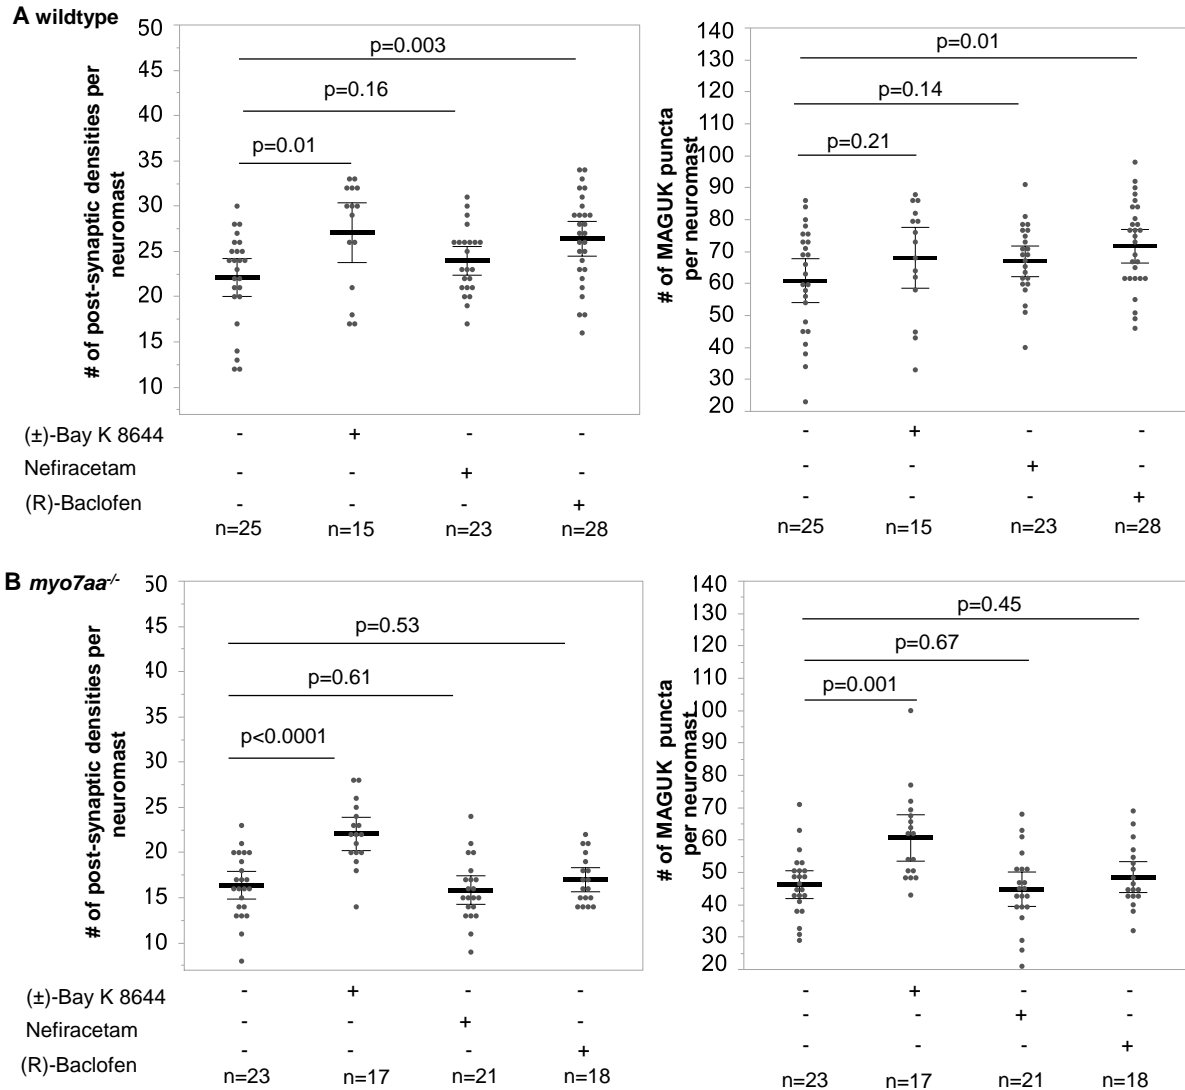

**Fig. S3 (±)-Bay K 8644 increases total number of post-synaptic densities per neuromast and total number of MAGUK puncta per neuromast in the *myo7aa*<sup>-/-</sup> mutants.** (A) 5 dpf wildtype neuromasts treated with (±)-Bay K 8644 have a greater number of post-synaptic densities and those treated with (R)-Baclofen have an increase in both the number of post-synaptic densities and total number of MAGUK puncta compared to untreated wildtype neuromasts (t-test). (B) 5 dpf *myo7aa*<sup>-/-</sup> neuromasts treated with (±)-Bay K 8644 have a greater number of post-synaptic densities and total number of MAGUK puncta compared to untreated *myo7aa*<sup>-/-</sup> neuromasts (t-test). Black bold line represents the mean of the data set and error bars are 95% confidence intervals.



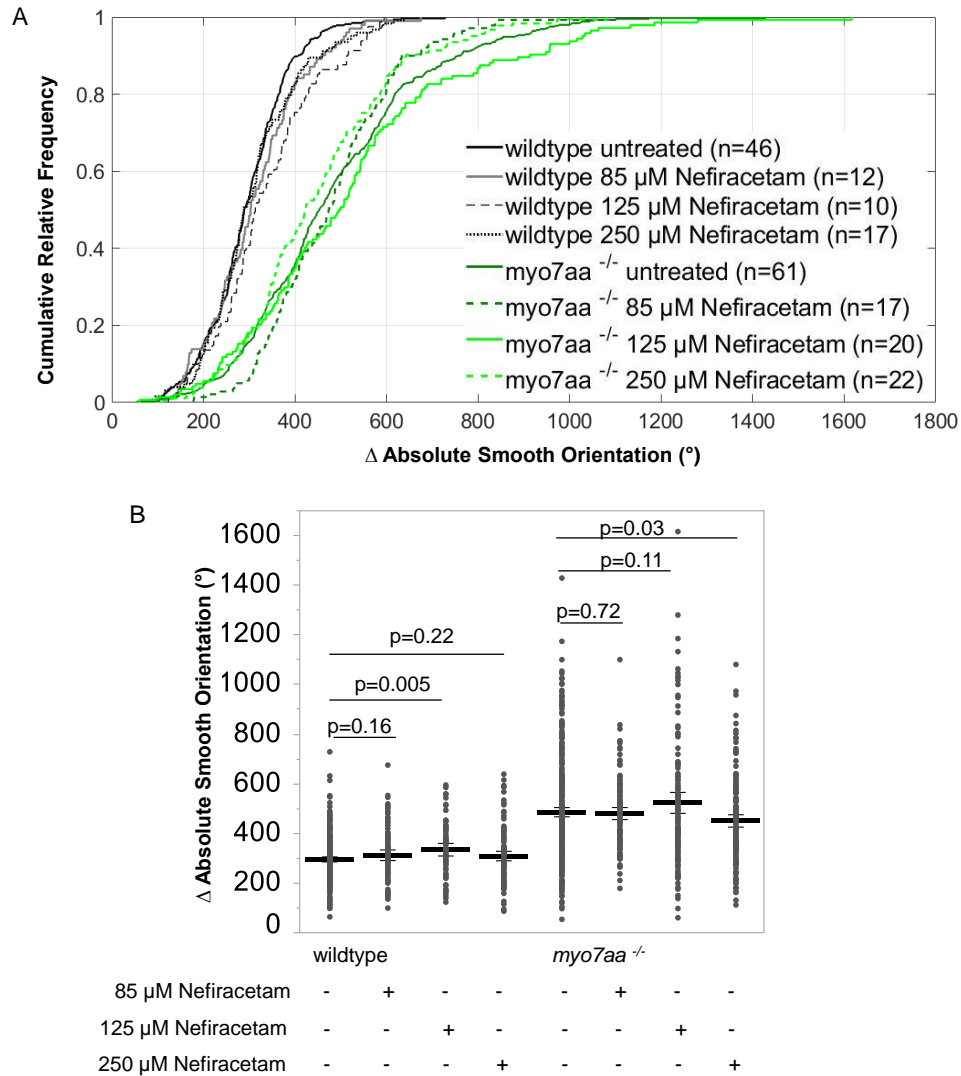

**Fig. S4 Different doses of Nefiracetam have different effects on wildtype and *myo7aa*<sup>-/-</sup> mutant swimming behavior.** This behavior assessment tracks movement of 5 dpf wildtype and *myo7aa*<sup>-/-</sup> larvae over a 2.5 minute interval with a 5 ms electric stimulus (50 mV) administered every 20 s. Ctrax software was used for video processing and Matlab 2012b for video analysis. (A, B) Incubation with 85  $\mu$ M and 250  $\mu$ M Nefiracetam had no adverse effects on wildtype swimming behavior; however incubation with 125  $\mu$ M increased the absolute smooth orientation (turning angle as a function of time) of wildtype larvae. Incubation with 85  $\mu$ M and 125  $\mu$ M Nefiracetam had no effect on *myo7aa*<sup>-/-</sup> larvae but incubation with 250  $\mu$ M did decrease the absolute smooth orientations compared to those untreated. Individual turning angles from populations of wildtype and *myo7aa*<sup>-/-</sup> larvae treated and untreated were used to construct the lines (t-test). The black bold line represents the mean of the data set and error bars are 95% confidence intervals. These experiments were replicated twice for each dose for each genotype.

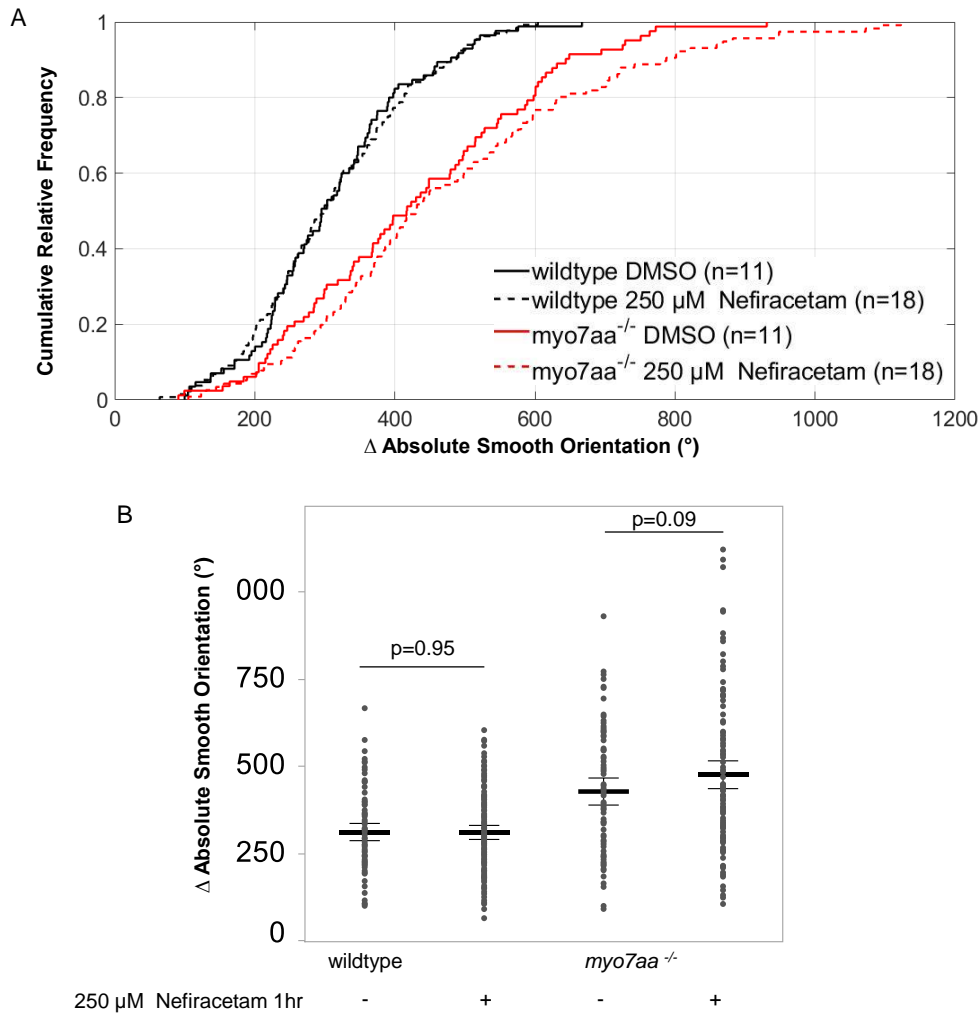

**Fig. S5 1 hour incubation does not suffice for Nefiracetam to affect swimming behavior of wildtype and *myo7aa*<sup>-/-</sup> mutants.** In order to determine if a shorter incubation period would provide similar responses to an overnight incubation the absolute smooth orientation was quantified. (A, B) Incubation with 250  $\mu$ M Nefiracetam for 1 hour had no adverse effects on wildtype swimming behavior and did not affect the absolute smooth orientation of the *myo7aa*<sup>-/-</sup> mutants, indicating that an overnight incubation is required. Individual turning angles from populations of wildtype and *myo7aa*<sup>-/-</sup> larvae treated and untreated were used to construct the lines (t-test). The black bold line represents the mean of the data set and error bars are 95% confidence intervals. These experiments were replicated twice for each dose for each genotype.

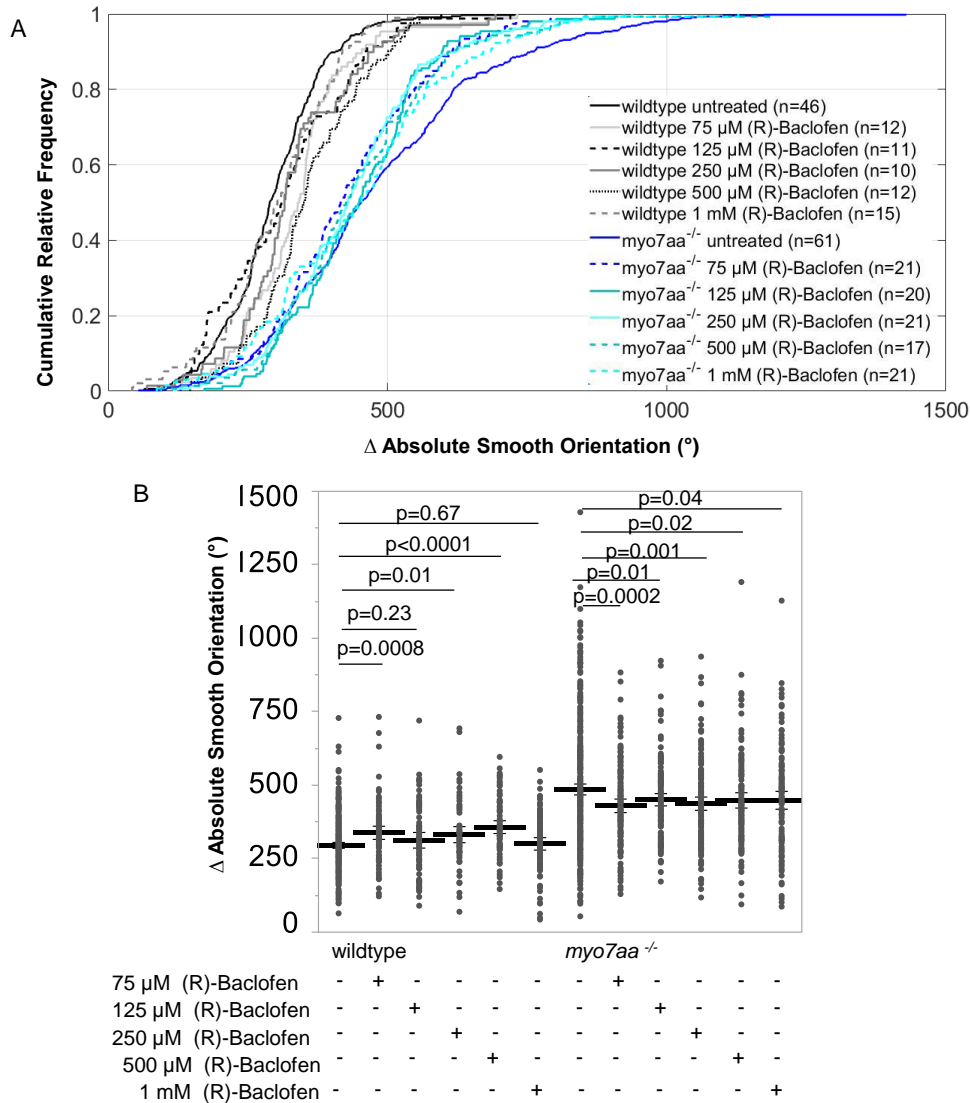

**Fig. S6 Different doses of (R)-Baclofen have different effects on wildtype and *myo7aa*<sup>-/-</sup> mutant swimming behavior.** (A, B) Incubation with 125  $\mu$ M and 1 mM (R)-Baclofen had no adverse effects on wildtype swimming behavior; however incubation with 75  $\mu$ M, 250  $\mu$ M and 500  $\mu$ M increased the absolute smooth orientation (turning angle as a function of time) of wildtype larvae. Incubation with all 5 doses of (R)-Baclofen did decrease the absolute smooth orientations of *myo7aa*<sup>-/-</sup> mutants compared to those untreated. Individual turning angles from populations of wildtype and *myo7aa*<sup>-/-</sup> larvae treated and untreated were used to construct the lines (t-test). The black bold line represents the mean of the data set and error bars are 95% confidence intervals. These experiments were replicated twice for each dose for each genotype.

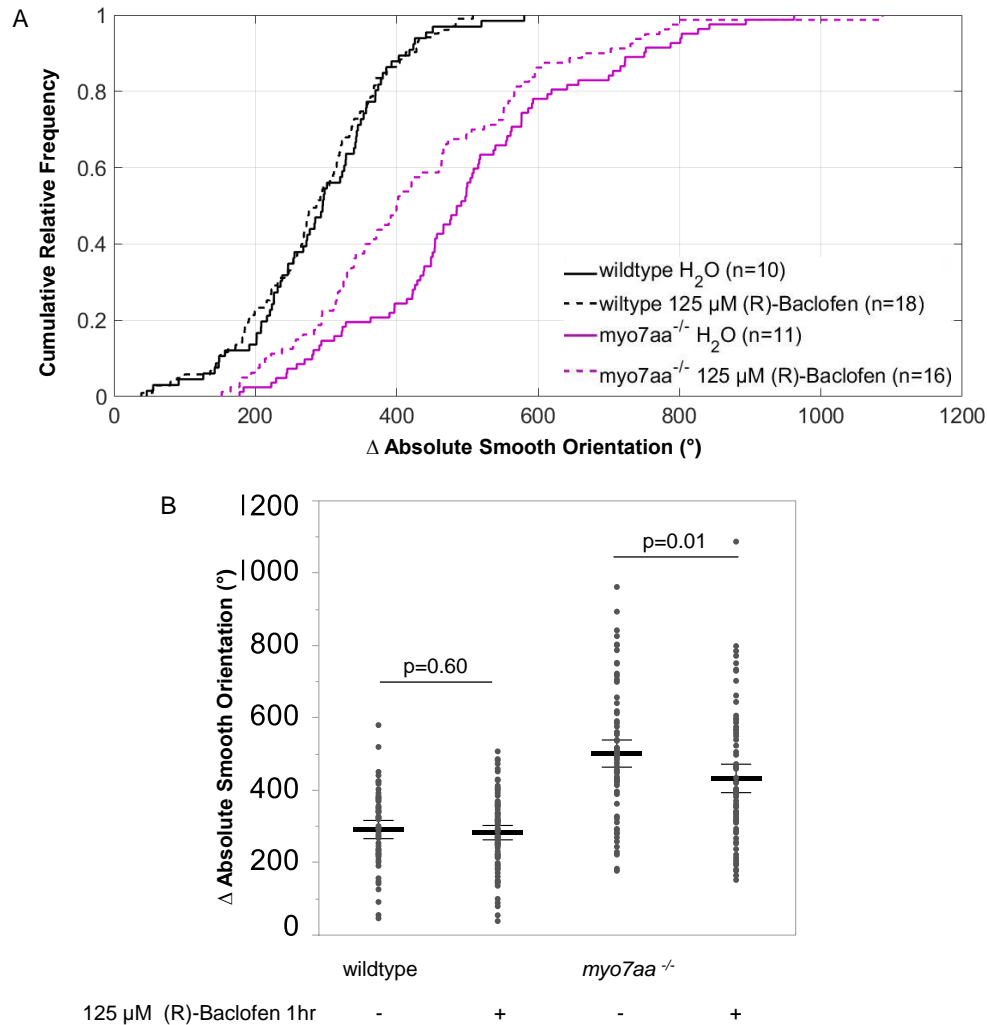

**Fig. S7 1 hour incubation with (R)-Baclofen is sufficient to affect swimming behavior of *myo7aa*<sup>-/-</sup> mutants.** In order to determine if a shorter incubation period would provide similar responses to an overnight incubation the absolute smooth orientation was quantified. (A, B) Incubation with 125  $\mu$ M (R)-Baclofen for 1 hour had no adverse effects on wildtype swimming behavior and interestingly did decrease the absolute smooth orientation of the *myo7aa*<sup>-/-</sup> mutants, indicating that 1 hour incubation is sufficient for this drug. Individual turning angles from populations of wildtype and *myo7aa*<sup>-/-</sup> larvae treated and untreated were used to construct the lines (t-test). The black bold line represents the mean of the data set and error bars are 95% confidence intervals. These experiments were replicated twice for each dose for each genotype.

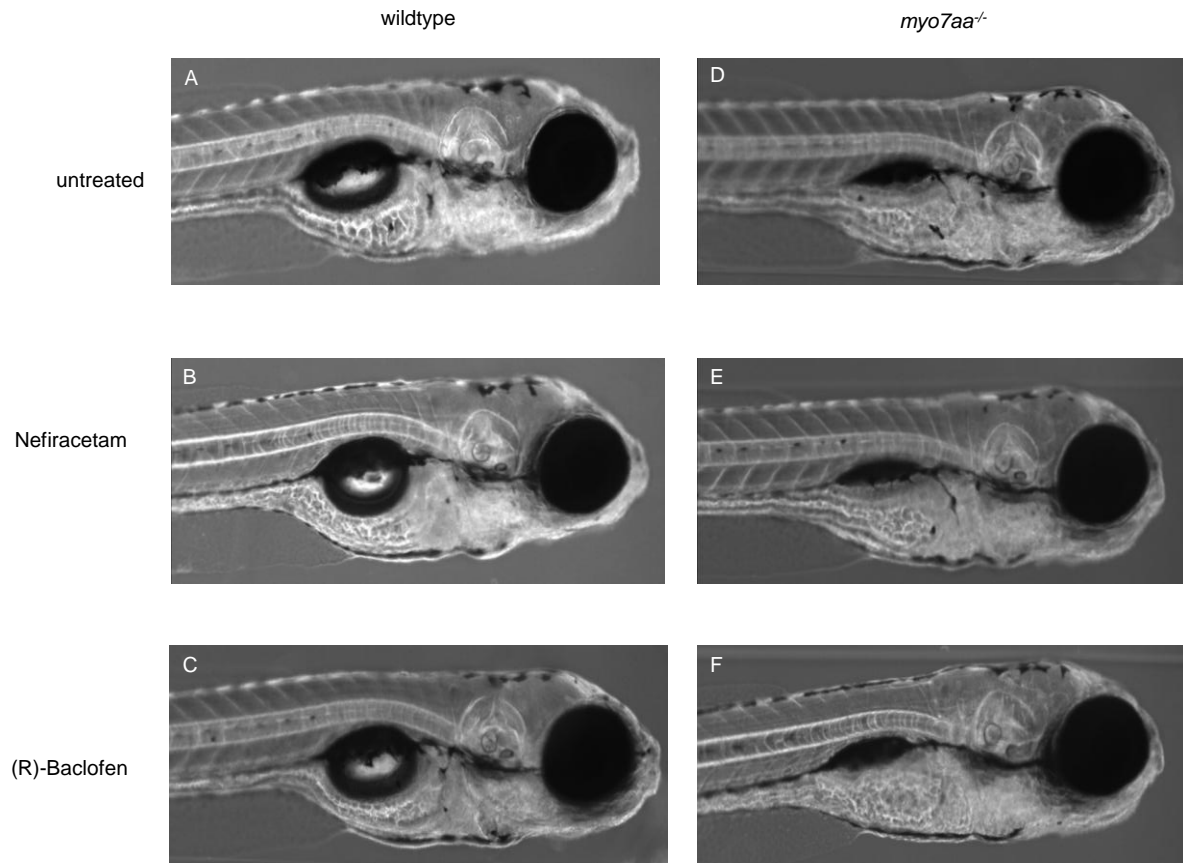

**Fig. S8** 250  $\mu$ M Nefiracetam and 125  $\mu$ M (R)-Baclofen have no effect on inflation of swim bladder on both wildtype and *myo7aa*<sup>-/-</sup> larvae. (A, B, C) At 5 dpf wildtype fish swim bladder inflation is unaffected upon incubation with either compound. (D, E, F) At 5 dpf *myo7aa*<sup>-/-</sup> mutant swim bladder inflation is unaffected upon incubation with either 250  $\mu$ M Nefiracetam or 125  $\mu$ M (R)-Baclofen. These experiments were replicated twice for each dose for each genotype.
